# Supplementary material for: Isolation and X-ray structural characterization of tetraisopropylpyrene cation radical
Source: Royal Society of Chemistry journal article supplement (doi:10.1039/b800168e), 2008-01-01
Supplement: b800168e.pdf [file b800168e.pdf]

## SUPPORTING INFORMATION FOR

# Isolation and X-ray structural characterization of tetraisopropylpyrene cation radical

*Moloy Banerjee, Vijay S. Vyas, Sergey V. Lindeman and Rajendra Rathore\**

Marquette University, Department of Chemistry, P.O. Box 1881,

Milwaukee, WI 53201-1881

### Table of Contents

|                                                                                                                                              |            |
|----------------------------------------------------------------------------------------------------------------------------------------------|------------|
| General experimental methods .....                                                                                                           | page S2-S3 |
| Figure S1: Cyclic and square-wave voltammograms of <b>3</b> .....                                                                            | page S3    |
| Synthesis of Compounds.....                                                                                                                  | page S4-S5 |
| <sup>1</sup> H and <sup>13</sup> C spectra of the Synthesized Compounds.....                                                                 | page S6-S8 |
| Preparation of <b>3<sup>•+</sup> SbCl<sub>6</sub><sup>-</sup></b> single crystals using NO <sup>+</sup> SbCl <sub>6</sub> <sup>-</sup> ..... | page S9    |
| Figure S2: ORTEP diagram of <b>3</b> .....                                                                                                   | page S9    |
| X-ray structural data for <b>3</b> .....                                                                                                     | page S10   |
| X-ray structural data for <b>3<sup>•+</sup> SbCl<sub>6</sub><sup>-</sup></b> .....                                                           | page S11   |

### **General Experimental Methods and Materials:**

All reactions were performed under argon atmosphere unless otherwise noted. All commercial reagents were used without further purification unless otherwise noted. Dichloromethane was repeatedly stirred with fresh aliquots of conc. sulfuric acid (~10 % by volume) until the acid layer remained colorless. After separation it was washed successively with water, aqueous sodium bicarbonate, water, and aqueous sodium chloride and dried over anhydrous calcium chloride. The dichloromethane was distilled twice from P<sub>2</sub>O<sub>5</sub> under an argon atmosphere and stored in a Schlenk flask equipped with a Teflon valve fitted with Viton O-rings. The hexanes and toluene were distilled from P<sub>2</sub>O<sub>5</sub> under an argon atmosphere and then refluxed over calcium hydride (~12 h). After distillation from CaH<sub>2</sub>, the solvents were stored in Schlenk flasks under an argon atmosphere. Tetrahydrofuran (THF) was dried initially by distilling over lithium aluminum hydride under an argon atmosphere. The THF was further refluxed over metallic sodium in the presence of benzophenone until a persistent blue color was obtained and then it was distilled under an argon atmosphere and stored in a Schlenk flask equipped with a Teflon valve fitted with Viton O-rings. NMR spectra were recorded on 300 and 400 MHz NMR spectrometers.

### **Cyclic Voltammetry (CV) :**

The CV cell was of an air-tight design with high vacuum Teflon valves and Viton O-ring seals to allow an inert atmosphere to be maintained without contamination by grease. The working electrode consisted of an adjustable platinum disk embedded in a glass seal to allow periodic polishing (with a fine emery cloth) without changing the surface area (~1 mm<sup>2</sup>) significantly. The reference SCE electrode (saturated calomel electrode) and its

salt bridge were separated from the catholyte by a sintered glass frit. The counter electrode consisted of a platinum gauze that was separated from the working electrode by ~3 mm. The CV measurements were carried out in a solution of 0.1 to 0.2 M supporting electrolyte (tetra-*n*-butylammonium hexafluorophosphate, TBAH) and  $2-5 \times 10^{-3}$  M substrate in dry dichloromethane under an argon atmosphere. All the cyclic voltammograms were recorded at a sweep rate of  $200 \text{ mV sec}^{-1}$ , unless otherwise specified and were IR compensated. The oxidation potentials ( $E_{1/2}$ ) were referenced to SCE, which was calibrated with added (equimolar) ferrocene ( $E_{1/2} = 0.450 \text{ V vs. SCE}$ ). The  $E_{1/2}$  values were calculated by taking the average of anodic and cathodic peak potentials in the reversible cyclic voltammograms.

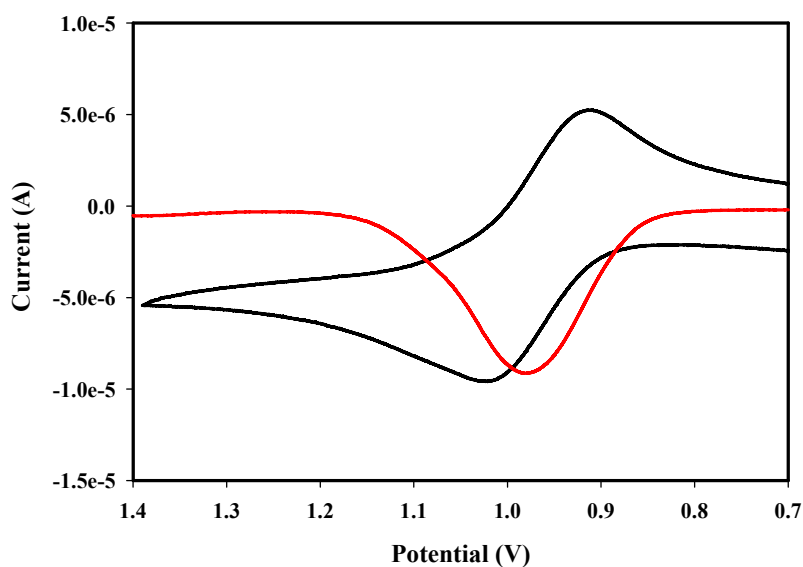

**Fig. S1:** Cyclic and square-wave voltammograms of  $2 \times 10^{-3} \text{ M } \mathbf{3}$  in  $\text{CH}_2\text{Cl}_2$  ( $0.1 \text{ M } n\text{-Bu}_4\text{NPF}_6$ ) at a scan rate of  $200 \text{ mVs}^{-1}$ .

**1,3,6,8-Tetrabromopyrene (1).** 1,3,6,8-Tetrabromopyrene was synthesized in 95 % yield by a reaction of pyrene with bromine in nitrobenzene according to a literature procedure (G. Venkataramana, S. Sankararaman, *Eur. J. Org. Chem.*, 2005, 4162).

**Isopropenyl boronic acid.** Trimethyl borate (40.88 mL, 360 mmol) was dissolved in 50 mL dry THF and cooled to -78 °C and a 0.5 M solution of isopropenylmagnesium bromide in THF (300 mL, 150 mmol) was added to it dropwise. The resulting white slurry was allowed to stir and warm to room temperature overnight. The reaction was then quenched with addition of 50 mL of water and most of the THF was evacuated by rotary evaporation. The remaining slurry was cooled to 0 °C and 150 mL of 2N HCl was added and stirred for 30 min under argon. It was then extracted with diethyl ether and the organic layer was dried with MgSO<sub>4</sub> to remove traces of water and concentrated to give the boronic acid (11.34 g, 88 % yield) as white powder. It was stored under argon with complete exclusion of moisture. M.p. 77-79 °C (dec); <sup>1</sup>H NMR (DMSO-d<sub>6</sub>, 300 MHz): δ 1.70 (t, *J* = 1.35 Hz, 3H), 5.42-5.44 (m, 1H), 5.56-5.58 (m, 1H); <sup>13</sup>C NMR (DMSO-d<sub>6</sub>, 75 MHz) δ 22.5, 127.6, 142.2.

**1,3,6,8-Tetraisopropenylpyrene (2).** Tetrabromopyrene (2.07 g, 4 mmol), isopropenylboronic acid (2.38 g, 28 mmol), potassium carbonate (4.42 g, 32 mmol) and Pd(PPh<sub>3</sub>)<sub>4</sub> (250 mg) was added to 50 mL of dioxane which was repeatedly degassed by evacuation and purging with argon gas. The mixture was refluxed in an argon atmosphere under the complete exclusion of light for 4 days after which it was quenched with the addition of water. The organic layer was extracted with dichloromethane, washed consecutively with water and brine before being dried over MgSO<sub>4</sub> and concentrated. The crude product was then chromatographed over silica gel pretreated with 2 %

triethylamine, using hexanes as eluent to afford 1.33 g of alkenylpyrene in 92 % yield. M.p. 268-270 °C ; <sup>1</sup>H NMR (CDCl<sub>3</sub>, 400 MHz): δ 2.38 (t, *J* = 1.06 Hz, 12H), 5.22-5.23 (m, 1H), 5.58-5.59 (m, 1H), 7.75 (s, 2H), 8.30 (s, 4H); <sup>13</sup>C NMR (CDCl<sub>3</sub>, 100 MHz) δ 25.9, 117.1, 124.8, 125.1, 126.1, 127.2, 139.3, 145.3.

**1,3,6,8-Tetraisopropylpyrene (3).** Tetraisopropenylpyrene (520 mg, 1.44 mmol) was suspended in 100 mL of a 4:1 mixture of ethyl acetate and ethanol and mixed with 400 mg of 10% Pd on charcoal. The resulting suspension was subjected to a pressure of 2-3 psi hydrogen gas for 3 h in a high pressure bottle after which an aliquot showed complete alkene reduction as adjudged by <sup>1</sup>H NMR. The mixture was then passed through a pad of silica gel and the pad was further washed with dichloromethane (3 x 25 mL). The solvent was evaporated and the resulting solid was further purified by column chromatography using silica gel and hexanes as eluent to afford 523 mg of tetraisopropylpyrene in 98 % yield. M.p. 278-280 °C; <sup>1</sup>H NMR (CDCl<sub>3</sub>, 400 MHz): δ 1.64 (d, *J* = 6.88 Hz, 24H), 4.15-4.22 (m, 4H), 8.07 (s, 2H), 8.43 (s, 4H); <sup>13</sup>C NMR (CDCl<sub>3</sub>, 100 MHz) δ 24.3, 29.4, 119.2, 121.9, 126.4, 126.7, 141.9.

## $^1\text{H}$ and $^{13}\text{C}$ spectra of the various synthesized compounds

### Isopropenyl boronic acid:

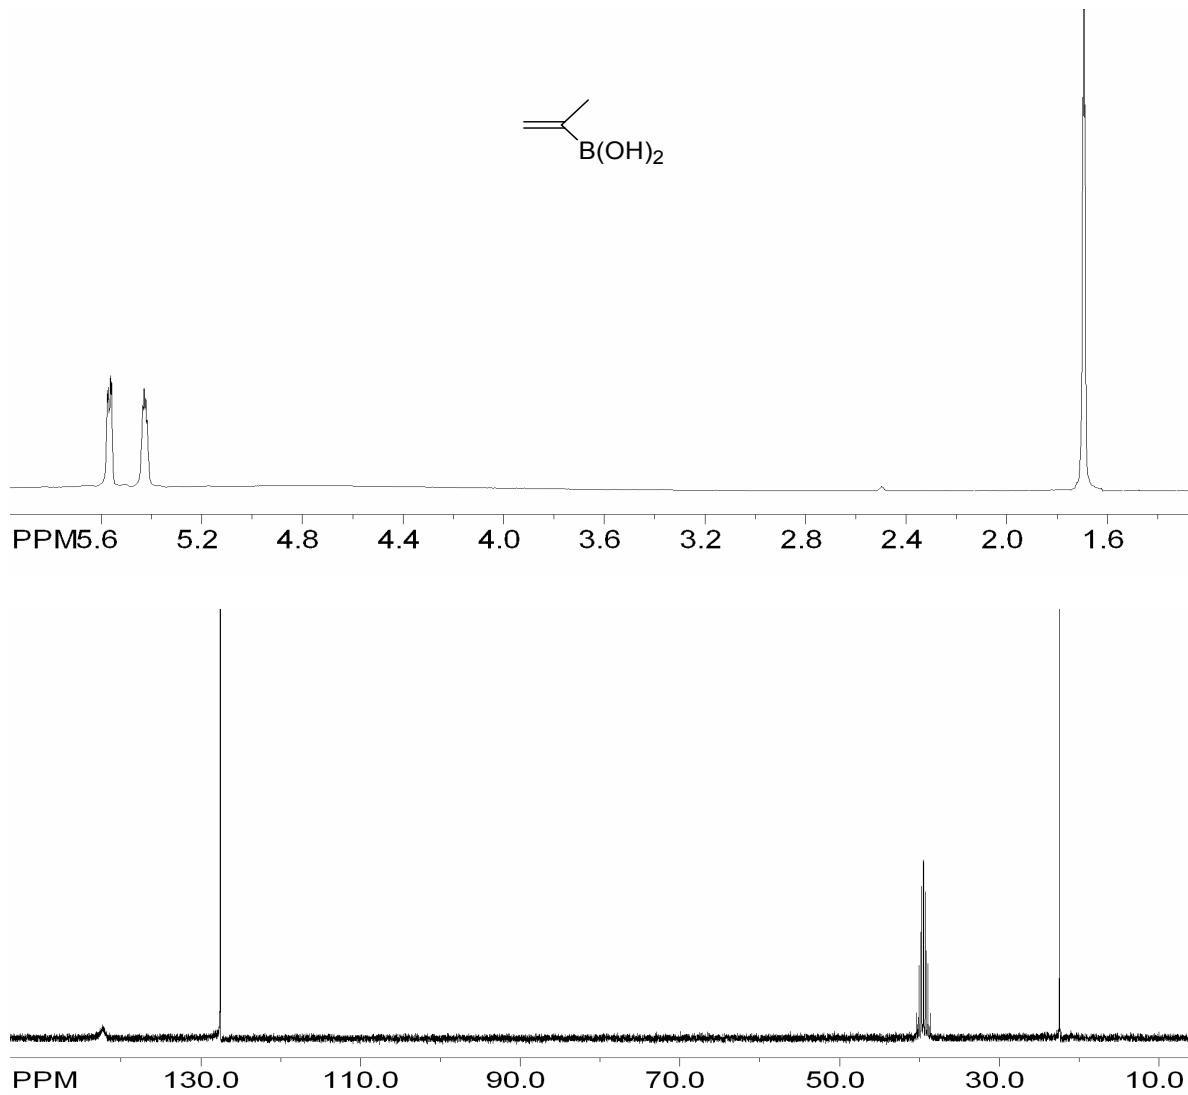

**1,3,6,8-Tetraisopropenylpyrene (2):**

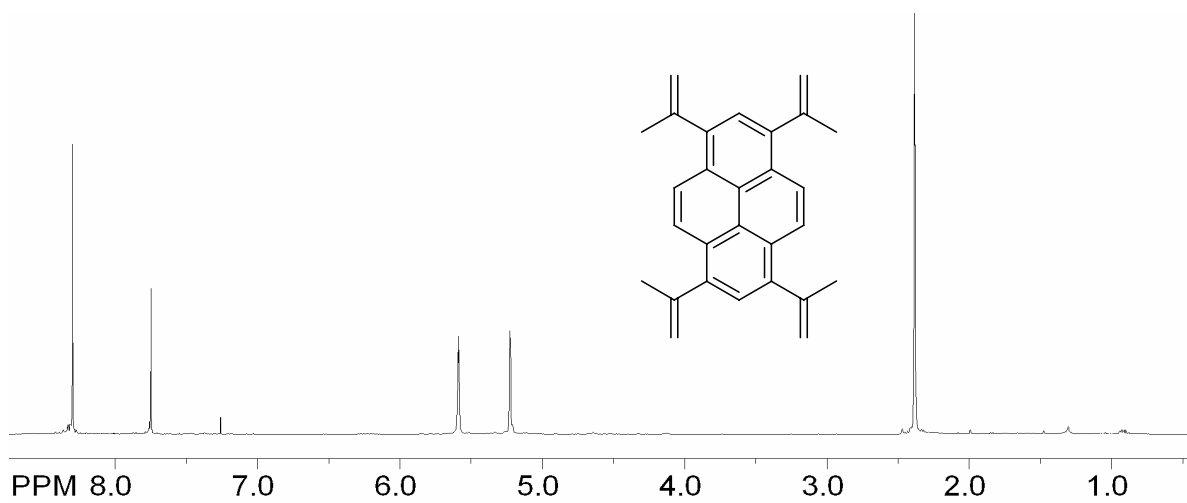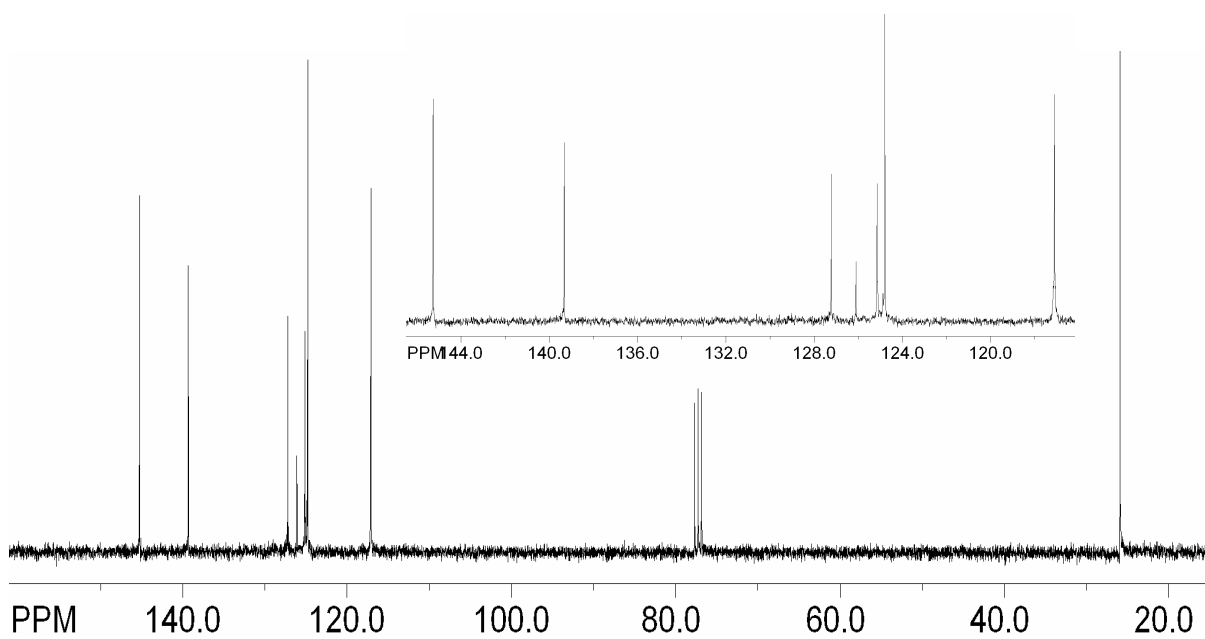

**1,3,6,8-Tetraisopropylpyrene (3):**

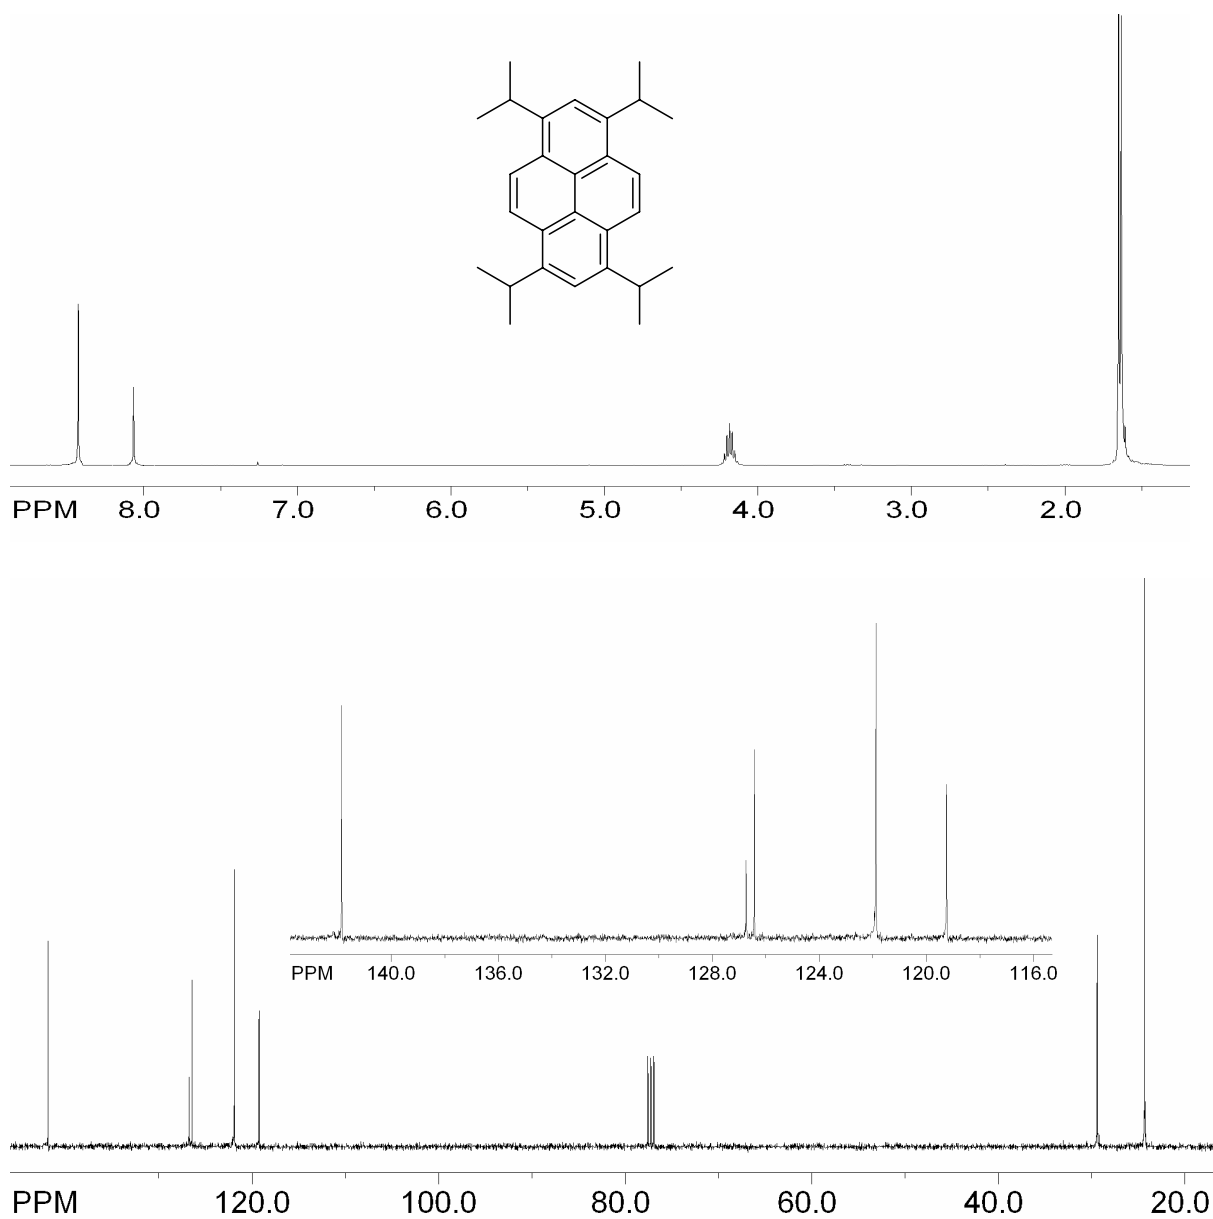



**Preparation of  $3^{\bullet+}$  SbCl<sub>6</sub><sup>-</sup> single crystals using NO<sup>+</sup>SbCl<sub>6</sub><sup>-</sup>.** A 50-mL flask fitted with a Schlenk adaptor was charged with nitrosonium hexachloroantimonate (44 mg, 0.12 mmol), and a cold solution of 1,3,6,8-tetraisopropylpyrene **3** (45 mg, 0.12 mmol) in anhydrous dichloromethane (20 mL) was added under an argon atmosphere at -10 °C. The solution immediately took on a green coloration and the solution was stirred (while slowly bubbling argon through the solution to entrain gaseous NO) for 30 min to yield a greenish-blue solution of cation radical [**3**<sup>•+</sup> SbCl<sub>6</sub><sup>-</sup>]. The solution was carefully layered with dry toluene (30 mL) and placed in a refrigerator (-20 °C) which after 2 days, produced greenish-blue needle shaped crystals of the cation radical suitable for X-ray structure analysis.

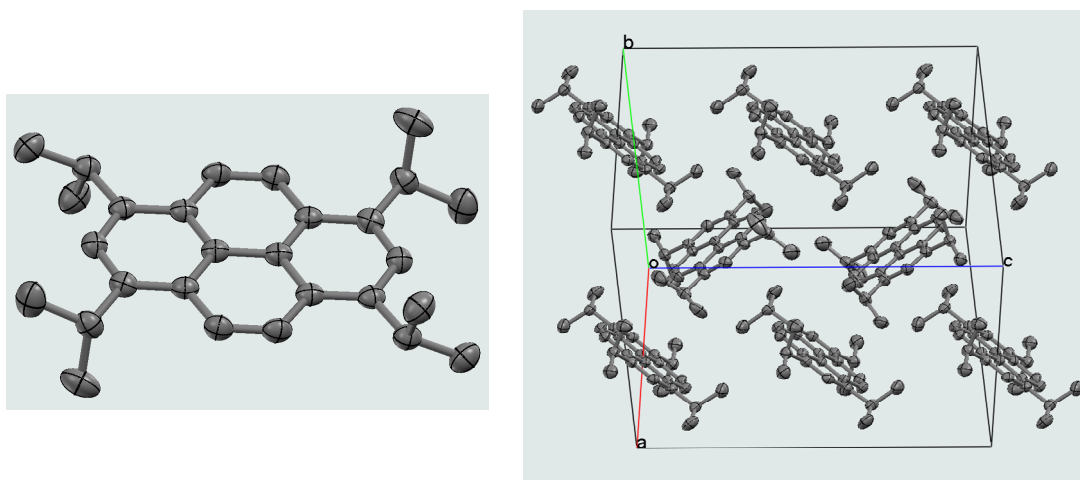

**Fig. S2.** The ORTEP diagram of **3** (**right**), with the packing diagram (**left**) with the ellipsoids shown in 50% probability.

### Crystal data and structure refinement for 1,3,6,8-Tetraisopropylpyrene (3)

|                                   |                                             |                  |
|-----------------------------------|---------------------------------------------|------------------|
| Identification code               |                                             |                  |
| Empirical formula                 | C <sub>28</sub> H <sub>34</sub>             |                  |
| Formula weight                    | 370.55                                      |                  |
| Temperature                       | 200(2) K                                    |                  |
| Wavelength                        | 1.54178 Å                                   |                  |
| Crystal system                    | Triclinic                                   |                  |
| Space group                       | P -1                                        |                  |
| Unit cell dimensions              | a = 11.3272(7) Å                            | α = 94.595(4)°.  |
|                                   | b = 12.6764(7) Å                            | β = 92.311(4)°.  |
|                                   | c = 16.9660(12) Å                           | γ = 115.064(3)°. |
| Volume                            | 2192.2(2) Å <sup>3</sup>                    |                  |
| Z                                 | 4                                           |                  |
| Density (calculated)              | 1.123 Mg/m <sup>3</sup>                     |                  |
| Absorption coefficient            | 0.463 mm <sup>-1</sup>                      |                  |
| F(000)                            | 808                                         |                  |
| Crystal size                      | 0.20 x 0.18 x 0.06 mm <sup>3</sup>          |                  |
| Theta range for data collection   | 2.62 to 67.24°.                             |                  |
| Index ranges                      | -13 ≤ h ≤ 13, -15 ≤ k ≤ 15, 0 ≤ l ≤ 19      |                  |
| Reflections collected             | 25845                                       |                  |
| Independent reflections           | 7547 [R(int) = 0.0397]                      |                  |
| Completeness to theta = 67.24°    | 96.1 %                                      |                  |
| Absorption correction             | Semi-empirical from equivalents             |                  |
| Max. and min. transmission        | 0.9727 and 0.9130                           |                  |
| Refinement method                 | Full-matrix least-squares on F <sup>2</sup> |                  |
| Data / restraints / parameters    | 7547 / 0 / 506                              |                  |
| Goodness-of-fit on F <sup>2</sup> | 1.064                                       |                  |
| Final R indices [I > 2σ(I)]       | R1 = 0.0644, wR2 = 0.1740                   |                  |
| R indices (all data)              | R1 = 0.0981, wR2 = 0.1900                   |                  |
| Extinction coefficient            | 0.0007(2)                                   |                  |
| Largest diff. peak and hole       | 0.243 and -0.188 e.Å <sup>-3</sup>          |                  |

## Crystal data and structure refinement for the 1,3,6,8-Tetraisopropylpyrene Cation Radical

Table 1. Crystal data and structure refinement for raj9wa.

|                                   |                                                    |          |
|-----------------------------------|----------------------------------------------------|----------|
| Identification code               | raj9wa                                             |          |
| Empirical formula                 | C <sub>42</sub> H <sub>50</sub> Cl <sub>6</sub> Sb |          |
| Formula weight                    | 889.27                                             |          |
| Temperature                       | 100(2) K                                           |          |
| Wavelength                        | 1.54178 Å                                          |          |
| Crystal system                    | Orthorhombic                                       |          |
| Space group                       | P nma                                              |          |
| Unit cell dimensions              | a = 13.8054(3) Å                                   | α = 90°. |
|                                   | b = 12.5572(3) Å                                   | β = 90°. |
|                                   | c = 23.6942(6) Å                                   | γ = 90°. |
| Volume                            | 4107.56(17) Å <sup>3</sup>                         |          |
| Z                                 | 4                                                  |          |
| Density (calculated)              | 1.438 Mg/m <sup>3</sup>                            |          |
| Absorption coefficient            | 9.129 mm <sup>-1</sup>                             |          |
| F(000)                            | 1820                                               |          |
| Crystal size                      | 0.51 x 0.23 x 0.14 mm <sup>3</sup>                 |          |
| Theta range for data collection   | 3.71 to 67.39°.                                    |          |
| Index ranges                      | 0 ≤ h ≤ 16, 0 ≤ k ≤ 15, 0 ≤ l ≤ 28                 |          |
| Reflections collected             | 34504                                              |          |
| Independent reflections           | 3746 [R(int) = 0.0324]                             |          |
| Completeness to theta = 67.39°    | 96.7 %                                             |          |
| Absorption correction             | Numerical                                          |          |
| Max. and min. transmission        | 0.3613 and 0.0897                                  |          |
| Refinement method                 | Full-matrix least-squares on F <sup>2</sup>        |          |
| Data / restraints / parameters    | 3746 / 50 / 255                                    |          |
| Goodness-of-fit on F <sup>2</sup> | 1.013                                              |          |
| Final R indices [I > 2σ(I)]       | R1 = 0.0268, wR2 = 0.0659                          |          |
| R indices (all data)              | R1 = 0.0272, wR2 = 0.0662                          |          |
| Extinction coefficient            | 0.00017(2)                                         |          |
| Largest diff. peak and hole       | 1.105 and -1.104 e.Å <sup>-3</sup>                 |          |
